# Supplementary material for: Chemical Heterogeneities in the Mantle: Progress Towards a General Quantitative Description
Source: Copernicus journal article supplement (doi:10.5194/se-2018-67), 2018-10-09
Supplement: Supplementary file 1 [file se-2018-67-supplement.pdf]

## *Supplementary Material:*

# **Chemical Heterogeneities in the Mantle: Progress Towards a General Quantitative Description**

M. Tirone<sup>1</sup>

<sup>1</sup>Department of Mathematics and Geosciences, University of Trieste, v. Weiss 2, 34128, Trieste, Italy

**Correspondence:** M. Tirone (max.tirone@gmail.com)

## **1 Supplementary Data**

This section describes the additional material available through an external data repository.

The link to access all the files is:

<https://figshare.com/s/9a97a1d047e783be8e54>

- 5 (Note: the private link will be revised and made public once the manuscript is accepted for publication.)

List of the available files:

– TWOPD-G-KIN.DATA.ZIP

10 – TWOPD-G-KIN.MOVIE1.AVI

– TWOPD-G-KIN.MOVIE5.AVI

– 2D-G-KIN.DATA.ZIP

– 2D-G-KIN.MOVIE5A.AVI

– 2D-G-KIN.MOVIE5B.AVI

15

### **1.1 1-D Simulations**

The zip file TWOPD-G-KIN.DATA.ZIP includes the data from three 1-D simulations assuming an initial proportion of 1:1, 5:1 and 50:1 ( $f = 1, 5, 50$ ). The details of the models are discussed in the main text. For every simulation there are two data files TWOPD-G-KIN1.1.DAT and TWOPD-G-KIN2.1.DAT for the case with 1:1 proportion, TWOPD-G-KIN1.5.DAT, 20 TWOPD-G-KIN2.5.DAT and TWOPD-G-KIN1.50.DAT, TWOPD-G-KIN2.50.DAT for the models with initial proportion 5:1 and 50:1, respectively. The data files are divided in blocks, each block of data refers to a particular time step. Data are

stored every 20 time steps during the numerical simulation.

The first data file for each simulation (TWOPD-G-KIN1 . 1 . DAT, TWOPD-G-KIN1 . 5 . DAT and TWOPD-G-KIN1 . 50 . DAT) includes in every block, distance,  $G(*)$  (joules) and the grid step size for the two sub-systems. The number of grid points for sub-system  $A$  and  $B$  are 101 and 101 in the first simulation, 501 and 101 in the second simulation, 1001 and 101 in the third  
5 simulation. Time step is 4, 40 and 800 for the three simulations. Data are stored every 20, 20, 50 numerical time steps respectively. Time, distance and step size have arbitrary units.

The second data file of each simulation (TWOPD-G-KIN2 . 1 . DAT, TWOPD-G-KIN2 . 5 . DAT and TWOPD-G-KIN2 . 50 . DAT) includes in every block, distance and abundance of nine oxides (wt%) describing the bulk composition at every grid point. The listed oxides are:  $SiO_2$ ,  $TiO_2$ ,  $Al_2O_3$ ,  $Fe_2O_3$ ,  $Cr_2O_3$ ,  $FeO$ ,  $MgO$ ,  $CaO$  and  $Na_2O$ .

10 Two animations TWOPD-G-KIN . MOVIE1 . AVI and TWOPD-G-KIN . MOVIE5 . AVI, available in the supplementary material, are based on the data in the zip file TWOPD-G-KIN . DATA . ZIP.

## 1.2 2-D Simulations

The results of two 2-D simulations are included in the zip file 2D-G-KIN . DATA . ZIP. Both simulations are based on the  
15 initial proportion set to 5:1. The first simulation assumes that assemblage  $A$  becomes mobile at time=1000000 (arbitrary units) while in the second simulation the dynamic assemblage is  $B$ . The interface between the two sub-systems is a vertical line. The downward velocity of the moving assemblages is set to 0.00625 (arbitrary units). The new material entering from the top side has the same bulk composition of the initial assemblage (the initial composition can be found in the main text). Data are stored every 400 time steps and the simulation time step is 16 (arbitrary units). Each block of data defined by the label "ZONE"  
20 provides information related to a particular time step.

The first data file of each simulation (2D-G-KIN1 . 5A . DAT and 2D-G-KIN1 . 5B . DAT) includes the distance x-direction, y-direction and  $G(*)$ . The number of grid points in the x-direction is 251 and 51 in sub-system  $A$  and  $B$ , respectively (total distance is 500 and 100 in arbitrary units). The number of grid points in the y-direction is 51 (total distance is 50 in arbitrary units). A block of data is divided in sub-blocks. Each sub-block consists of  $(251 + 51) \times 51$  data points. The first sub-block  
25 contains the x-coordinate of the numerical grid, the second sub-block the y-coordinate and the third sub-block the  $G(*)$  values at every grid point.

The second data file of each simulation (2D-G-KIN2 . 5A . DAT and 2D-G-KIN2 . 5B . DAT) follows the same data structure, except that instead of  $G(*)$ , nine bulk oxides are listed in nine sub-blocks. The sequence of oxides is the same reported for the 1-D models.

30 The data in the zip file 2D-G-KIN . DATA . AVI have been used to create two animations, 2D-G-KIN . MOVIE5A . AVI and 2D-G-KIN . MOVIE5B . AVI, both are available following the link to the external data repository.

## 2 Supplementary Tables

The following tables report the initial bulk composition and the proportion factor  $f$  of the two sub-systems for all the 43 cases considered in this study.



**Table 2.** (continue) Initial bulk composition of the two assemblages and proportion factor  $f$ .

| bulk comp.                     | (A <sub>0</sub> ) | (B <sub>0</sub> ) |
|--------------------------------|-------------------|-------------------|-------------------|-------------------|-------------------|-------------------|-------------------|-------------------|-------------------|-------------------|
| oxides wt%                     | 21(f=20)          |                   | 22(f=100)         |                   | 23(f=500)         |                   | 24(f=1)           |                   | 25(f=10)          |                   |
| SiO <sub>2</sub>               | 48.940            | 48.860            | 48.940            | 48.860            | 48.940            | 48.860            | 49.619            | 48.860            | 49.619            | 48.860            |
| TiO <sub>2</sub>               | 0.393             | 0.370             | 0.393             | 0.370             | 0.393             | 0.370             | 0.426             | 0.370             | 0.426             | 0.370             |
| Al <sub>2</sub> O <sub>3</sub> | 10.394            | 17.720            | 10.394            | 17.720            | 10.394            | 17.720            | 11.372            | 17.720            | 11.372            | 17.720            |
| Fe <sub>2</sub> O <sub>3</sub> | 0.820             | 0.840             | 0.820             | 0.840             | 0.820             | 0.840             | 0.918             | 0.840             | 0.918             | 0.840             |
| Cr <sub>2</sub> O <sub>3</sub> | 0.237             | 0.030             | 0.237             | 0.030             | 0.237             | 0.030             | 0.219             | 0.030             | 0.219             | 0.030             |
| FeO                            | 7.074             | 7.610             | 7.074             | 7.610             | 7.074             | 7.610             | 6.745             | 7.610             | 6.745             | 7.610             |
| MgO                            | 18.887            | 9.100             | 18.887            | 9.100             | 18.887            | 9.100             | 16.074            | 9.100             | 16.074            | 9.100             |
| CaO                            | 10.505            | 12.500            | 10.505            | 12.500            | 10.505            | 12.500            | 11.518            | 12.500            | 11.518            | 12.500            |
| Na <sub>2</sub> O              | 2.751             | 2.970             | 2.751             | 2.970             | 2.751             | 2.970             | 3.109             | 2.970             | 3.109             | 2.970             |
| sum                            | 100               | 100               | 100               | 100               | 100               | 100               | 100               | 100               | 100               | 100               |
|                                | 26(f=20)          |                   | 27(f=100)         |                   | 28(f=500)         |                   | 29(f=1)           |                   | 30(f=5)           |                   |
| SiO <sub>2</sub>               | 49.619            | 48.860            | 49.619            | 48.860            | 49.619            | 48.860            | 45.200            | 45.931            | 45.200            | 45.931            |
| TiO <sub>2</sub>               | 0.426             | 0.370             | 0.426             | 0.370             | 0.426             | 0.370             | 0.200             | 0.199             | 0.200             | 0.199             |
| Al <sub>2</sub> O <sub>3</sub> | 11.372            | 17.720            | 11.372            | 17.720            | 11.372            | 17.720            | 3.940             | 18.599            | 3.940             | 18.599            |
| Fe <sub>2</sub> O <sub>3</sub> | 0.918             | 0.840             | 0.918             | 0.840             | 0.918             | 0.840             | 0.200             | 0.351             | 0.200             | 0.351             |
| Cr <sub>2</sub> O <sub>3</sub> | 0.219             | 0.030             | 0.219             | 0.030             | 0.219             | 0.030             | 0.400             | 0.015             | 0.400             | 0.015             |
| FeO                            | 6.745             | 7.610             | 6.745             | 7.610             | 6.745             | 7.610             | 8.100             | 8.576             | 8.100             | 8.576             |
| MgO                            | 16.074            | 9.100             | 16.074            | 9.100             | 16.074            | 9.100             | 38.400            | 17.507            | 38.400            | 17.507            |
| CaO                            | 11.518            | 12.500            | 11.518            | 12.500            | 11.518            | 12.500            | 3.150             | 7.623             | 3.150             | 7.623             |
| Na <sub>2</sub> O              | 3.109             | 2.970             | 3.109             | 2.970             | 3.109             | 2.970             | 0.410             | 1.199             | 0.410             | 1.199             |
| sum                            | 100               | 100               | 100               | 100               | 100               | 100               | 100               | 100               | 100               | 100               |
|                                | 31(f=20)          |                   | 32(f=100)         |                   | 33(f=500)         |                   | 34(f=1)           |                   | 35(f=5)           |                   |
| SiO <sub>2</sub>               | 45.200            | 45.931            | 45.200            | 45.931            | 45.200            | 45.931            | 45.200            | 45.914            | 45.200            | 45.914            |
| TiO <sub>2</sub>               | 0.200             | 0.199             | 0.200             | 0.199             | 0.200             | 0.199             | 0.200             | 0.216             | 0.200             | 0.216             |
| Al <sub>2</sub> O <sub>3</sub> | 3.940             | 18.599            | 3.940             | 18.599            | 3.940             | 18.599            | 3.940             | 18.582            | 3.940             | 18.582            |
| Fe <sub>2</sub> O <sub>3</sub> | 0.200             | 0.351             | 0.200             | 0.351             | 0.200             | 0.351             | 0.200             | 0.296             | 0.200             | 0.296             |
| Cr <sub>2</sub> O <sub>3</sub> | 0.400             | 0.015             | 0.400             | 0.015             | 0.400             | 0.015             | 0.400             | 0.005             | 0.400             | 0.005             |
| FeO                            | 8.100             | 8.576             | 8.100             | 8.576             | 8.100             | 8.576             | 8.100             | 8.015             | 8.100             | 8.015             |
| MgO                            | 38.400            | 17.507            | 38.400            | 17.507            | 38.400            | 17.507            | 38.400            | 18.551            | 38.400            | 18.551            |
| CaO                            | 3.150             | 7.623             | 3.150             | 7.623             | 3.150             | 7.623             | 3.150             | 7.459             | 3.150             | 7.459             |
| Na <sub>2</sub> O              | 0.410             | 1.199             | 0.410             | 1.199             | 0.410             | 1.199             | 0.410             | 0.962             | 0.410             | 0.962             |
| sum                            | 100               | 100               | 100               | 100               | 100               | 100               | 100               | 100               | 100               | 100               |
|                                | 36(f=20)          |                   | 37(f=100)         |                   | 38(f=500)         |                   | 39(f=1)           |                   | 40(f=5)           |                   |
| SiO <sub>2</sub>               | 45.200            | 45.914            | 45.200            | 45.914            | 45.200            | 45.914            | 45.200            | 45.804            | 45.200            | 45.804            |
| TiO <sub>2</sub>               | 0.200             | 0.216             | 0.200             | 0.216             | 0.200             | 0.216             | 0.200             | 0.281             | 0.200             | 0.281             |
| Al <sub>2</sub> O <sub>3</sub> | 3.940             | 18.582            | 3.940             | 18.582            | 3.940             | 18.582            | 3.940             | 18.319            | 3.940             | 18.319            |
| Fe <sub>2</sub> O <sub>3</sub> | 0.200             | 0.296             | 0.200             | 0.296             | 0.200             | 0.296             | 0.200             | 0.246             | 0.200             | 0.246             |
| Cr <sub>2</sub> O <sub>3</sub> | 0.400             | 0.005             | 0.400             | 0.005             | 0.400             | 0.005             | 0.400             | 0.015             | 0.400             | 0.015             |
| FeO                            | 8.100             | 8.015             | 8.100             | 8.015             | 8.100             | 8.015             | 8.100             | 7.482             | 8.100             | 7.482             |
| MgO                            | 38.400            | 18.551            | 38.400            | 18.551            | 38.400            | 18.551            | 38.400            | 18.834            | 38.400            | 18.834            |
| CaO                            | 3.150             | 7.459             | 3.150             | 7.459             | 3.150             | 7.459             | 3.150             | 8.295             | 3.150             | 8.295             |
| Na <sub>2</sub> O              | 0.410             | 0.962             | 0.410             | 0.962             | 0.410             | 0.962             | 0.410             | 0.723             | 0.410             | 0.723             |
| sum                            | 100               | 100               | 100               | 100               | 100               | 100               | 100               | 100               | 100               | 100               |

**Table 3.** (continue) Initial bulk composition of the two assemblages and proportion factor  $f$ .

| bulk comp.                     | ( $A_0$ )    | ( $B_0$ ) | ( $A_0$ )     | ( $B_0$ ) | ( $A_0$ )     | ( $B_0$ ) |
|--------------------------------|--------------|-----------|---------------|-----------|---------------|-----------|
| oxides wt%                     | 41( $f=20$ ) |           | 42( $f=100$ ) |           | 43( $f=500$ ) |           |
| SiO <sub>2</sub>               | 45.200       | 45.804    | 45.200        | 45.804    | 45.200        | 45.804    |
| TiO <sub>2</sub>               | 0.200        | 0.281     | 0.200         | 0.281     | 0.200         | 0.281     |
| Al <sub>2</sub> O <sub>3</sub> | 3.940        | 18.319    | 3.940         | 18.319    | 3.940         | 18.319    |
| Fe <sub>2</sub> O <sub>3</sub> | 0.200        | 0.246     | 0.200         | 0.246     | 0.200         | 0.246     |
| Cr <sub>2</sub> O <sub>3</sub> | 0.400        | 0.015     | 0.400         | 0.015     | 0.400         | 0.015     |
| FeO                            | 8.100        | 7.482     | 8.100         | 7.482     | 8.100         | 7.482     |
| MgO                            | 38.400       | 18.834    | 38.400        | 18.834    | 38.400        | 18.834    |
| CaO                            | 3.150        | 8.295     | 3.150         | 8.295     | 3.150         | 8.295     |
| Na <sub>2</sub> O              | 0.410        | 0.723     | 0.410         | 0.723     | 0.410         | 0.723     |
| sum                            | 100          | 100       | 100           | 100       | 100           | 100       |
